# Supplementary material for: Do ‘physicians in the lead’ support a holistic healthcare delivery approach? A qualitative analysis of stakeholders’ perspectives
Source: PubMed Central journal article supplement — BMJ Open. 2018 Jul 19;8(7):e020739. doi: 10.1136/bmjopen-2017-020739 (PMC6059316; doi:10.1136/bmjopen-2017-020739), 2018-07-19
Supplement: bmjopen-2017-020739supp001.pdf [file bmjopen-2017-020739supp001.pdf]

## APPENDIX

### Appendix 1: Topic list

| Topics                                        | Sub-topics                                                                                                                                                                                                                                                                                                                                                                                                                                                                                                                                                                        |
|-----------------------------------------------|-----------------------------------------------------------------------------------------------------------------------------------------------------------------------------------------------------------------------------------------------------------------------------------------------------------------------------------------------------------------------------------------------------------------------------------------------------------------------------------------------------------------------------------------------------------------------------------|
| <b>Change in healthcare delivery approach</b> | <ul style="list-style-type: none"><li>- Are you familiar with the changes in healthcare delivery demanded by the Dutch Ministry of Health?</li><li>- What do you know about the organization of this transition to value-based and holistic healthcare delivery?</li></ul> <p>After introducing these topics, participants received an introduction to the six dimensions of holistic health proposed by Huber et al.(6) and the reorganization of healthcare delivery demanded by the Dutch Ministry of Health. After this introduction, the following questions were asked:</p> |
| <b>Organization of care</b>                   | <ul style="list-style-type: none"><li>- What are your perspectives on the transition to value-based and holistic healthcare delivery?</li><li>- How would you like this desired care delivery to be organized?</li></ul>                                                                                                                                                                                                                                                                                                                                                          |
| <b>Coordination</b>                           | <ul style="list-style-type: none"><li>- Who should take leadership in the organization of this care and in supporting the patient?</li></ul>                                                                                                                                                                                                                                                                                                                                                                                                                                      |
| <b>Physicians in the lead</b>                 | <ul style="list-style-type: none"><li>- What do you think about 'physicians in the lead' in holistic healthcare?</li><li>- What are the advantages, barriers, opportunities for improvement, and risks in the transition to the desired healthcare approach?</li><li>- Do you think the strategy of 'physicians in the lead' will lead to holistic healthcare?</li></ul>                                                                                                                                                                                                          |
